# Supplementary material for: Pyrochlore-type oxide solid solutions: (Bi1−xGax)2−dTi2O7−3d/2
Source: Royal Society of Chemistry journal article supplement (doi:10.1039/c9tc06074j), 2019-12-05
Supplement: c9tc06074j1.pdf [file c9tc06074j1.pdf]

## Supplementary Information

### Pyrochlore-type oxide solid solutions $(\text{Bi}_{1-x}\text{Ga}_x)_{2-d}\text{Ti}_2\text{O}_{7-3d/2}$

Hisanori Yamane,<sup>\*a</sup> Ryota Yagi<sup>a,b</sup> and Takahiro Yamada

<sup>a</sup> Institute of Multidisciplinary Research for Advanced Materials, Tohoku University, 2-1-1 Katahira, Aoba-ku, Sendai 980-8577, Japan

<sup>b</sup> Department of Metallurgy, Materials Science and Materials Processing, Tohoku University 6-6-04 Aramaki Aza Aoba, Aoba-ku, Sendai 980-8579, Japan

E-mail adress: hisanori.yamane.a1@tohoku.ac.jp (H. Yamane)

**Table S1** Compositions of the starting mixtures, heating times, compounds prepared at 1100 °C, and cubic cell parameters,  $a$ , for the pyrochlore phases.

**Table S2** Results of EPMA of a  $(\text{Bi}_{1.62}\text{Ga}_{0.14}\text{Ti}_2\text{O}_{6.64})$  single crystal prepared by slow cooling from 1250 °C.

**Table S3** Anisotropic displacement parameters ( $\text{Å}^2$ ) for  $\text{Bi}_{1.62}\text{Ga}_{0.14}\text{Ti}_2\text{O}_{6.64}$ .

**Fig. S1** TG-DTA curves generated by  $(\text{Bi}_{1-x}\text{Ga}_x)_{2-d}\text{Ti}_2\text{O}_{7-3d/2}$  ( $x = 0.09$ ,  $d = 0.08$ , sample 35) on heating (red) and on cooling (blue).

**Fig. S2** Temperature dependence of the dielectric constant  $\epsilon_r$ , and loss  $\tan\delta$  values determined for  $(\text{Bi}_{1-x}\text{Ga}_x)_{2-d}\text{Ti}_2\text{O}_{7-3d/2}$  (sample 29 ( $x = 0.06$ ,  $d = 0.15$ )) at 1 MHz.

**Table S1** Composition of the starting mixture, heating time, compounds prepared at 1100 °C, and a cubic cell parameter  $a$  of a pyrochlore phase.

| Sample | Composition (mol%) |                    |                  | Heating time (h) | Compounds                                                                                                                                                                                                                  | pyrochlore-phase $a$ (Å) |
|--------|--------------------|--------------------|------------------|------------------|----------------------------------------------------------------------------------------------------------------------------------------------------------------------------------------------------------------------------|--------------------------|
|        | BiO <sub>1.5</sub> | GaO <sub>1.5</sub> | TiO <sub>2</sub> |                  |                                                                                                                                                                                                                            |                          |
| 1      | 15.0               | 5.0                | 80.0             | 48 + 48          | TiO <sub>2</sub> , (Bi <sub>1-x</sub> Ga <sub>x</sub> ) <sub>2-d</sub> Ti <sub>2</sub> O <sub>7-3d/2</sub> , BiGaTi <sub>4</sub> O <sub>11</sub>                                                                           |                          |
| 2      | 5.0                | 15.0               | 80.0             | 48 + 48          | Ga <sub>2</sub> O <sub>3</sub> , TiO <sub>2</sub> , BiGaTi <sub>4</sub> O <sub>11</sub>                                                                                                                                    |                          |
| 3      | 17.2               | 10.3               | 72.4             | 48 + 48          | TiO <sub>2</sub> , (Bi <sub>1-x</sub> Ga <sub>x</sub> ) <sub>2-d</sub> Ti <sub>2</sub> O <sub>7-3d/2</sub> , BiGaTi <sub>4</sub> O <sub>11</sub>                                                                           |                          |
| 4      | 33.3               | 0.0                | 66.7             | 12 + 12          | Bi <sub>2</sub> Ti <sub>4</sub> O <sub>11</sub>                                                                                                                                                                            |                          |
| 5      | 30.0               | 3.3                | 66.7             | 12 + 12          | TiO <sub>2</sub> , (Bi <sub>1-x</sub> Ga <sub>x</sub> ) <sub>2-d</sub> Ti <sub>2</sub> O <sub>7-3d/2</sub> , Bi <sub>2</sub> Ti <sub>4</sub> O <sub>11</sub>                                                               |                          |
| 6      | 16.7               | 16.7               | 66.7             | 48 + 48          | BiGaTi <sub>4</sub> O <sub>11</sub> , TiO <sub>2</sub>                                                                                                                                                                     |                          |
| 7      | 31.7               | 3.3                | 65.0             | 12 + 12          | TiO <sub>2</sub> , (Bi <sub>1-x</sub> Ga <sub>x</sub> ) <sub>2-d</sub> Ti <sub>2</sub> O <sub>7-3d/2</sub> , Bi <sub>2</sub> Ti <sub>4</sub> O <sub>11</sub>                                                               |                          |
| 8      | 32.7               | 5.8                | 61.5             | 48 + 48          | TiO <sub>2</sub> , (Bi <sub>1-x</sub> Ga <sub>x</sub> ) <sub>2-d</sub> Ti <sub>2</sub> O <sub>7-3d/2</sub> , BiGaTi <sub>4</sub> O <sub>11</sub>                                                                           |                          |
| 9      | 5.8                | 32.7               | 61.5             | 48 + 48          | Ga <sub>2</sub> O <sub>3</sub> , TiO <sub>2</sub> , BiGaTi <sub>4</sub> O <sub>11</sub>                                                                                                                                    |                          |
| 10     | 25.0               | 25.0               | 50.0             | 48 + 48          | (Bi <sub>1-x</sub> Ga <sub>x</sub> ) <sub>2-d</sub> Ti <sub>2</sub> O <sub>7-3d/2</sub> , Ga <sub>2</sub> O <sub>3</sub> , BiGaTi <sub>4</sub> O <sub>11</sub>                                                             |                          |
| 11     | 35.0               | 20.0               | 45.0             | 12 + 12          | (Bi <sub>1-x</sub> Ga <sub>x</sub> ) <sub>2-d</sub> Ti <sub>2</sub> O <sub>7-3d/2</sub> , Ga <sub>2</sub> O <sub>3</sub> , BiGaTi <sub>4</sub> O <sub>11</sub>                                                             |                          |
| 12     | 45.0               | 15.0               | 40.0             | 12 + 12          | (Bi <sub>1-x</sub> Ga <sub>x</sub> ) <sub>2-d</sub> Ti <sub>2</sub> O <sub>7-3d/2</sub> , Bi <sub>4</sub> Ti <sub>3</sub> O <sub>12</sub> , Ga <sub>2</sub> O <sub>3</sub>                                                 |                          |
| 13     | 33.3               | 33.3               | 33.3             | 48 + 48          | (melt)                                                                                                                                                                                                                     |                          |
| 14     | 14.3               | 52.4               | 33.3             | 48 + 48          | (Bi <sub>1-x</sub> Ga <sub>x</sub> ) <sub>2-d</sub> Ti <sub>2</sub> O <sub>7-3d/2</sub> , Ga <sub>2</sub> O <sub>3</sub> , BiGaTi <sub>4</sub> O <sub>11</sub>                                                             |                          |
| 15     | 50.0               | 25.0               | 25.0             | 48 + 48          | (melt)                                                                                                                                                                                                                     |                          |
| 16     | 40.0               | 40.0               | 20.0             | 48 + 48          | (melt)                                                                                                                                                                                                                     |                          |
| 17     | 25.0               | 50.0               | 25.0             | 48 + 48          | (melt)                                                                                                                                                                                                                     |                          |
| 18     | 66.7               | 16.7               | 16.7             | 48 + 48          | (melt)                                                                                                                                                                                                                     |                          |
| 19     | 85.2               | 11.1               | 3.7              | 48 + 48          | (melt)                                                                                                                                                                                                                     |                          |
| 20     | 26.4               | 64.2               | 9.4              | 48 + 48          | (melt)                                                                                                                                                                                                                     |                          |
| 21     | 50.0               | 0.0                | 50.0             | 12 + 12          | Bi <sub>4</sub> Ti <sub>3</sub> O <sub>12</sub> , Bi <sub>2</sub> Ti <sub>4</sub> O <sub>11</sub>                                                                                                                          |                          |
| 22     | 45.0               | 1.5                | 53.5             | 12 + 12          | (Bi <sub>1-x</sub> Ga <sub>x</sub> ) <sub>2-d</sub> Ti <sub>2</sub> O <sub>7-3d/2</sub> , Bi <sub>2</sub> Ti <sub>4</sub> O <sub>11</sub>                                                                                  |                          |
| 23     | 41.5               | 4.5                | 54.0             | 12 + 12          | (Bi <sub>1-x</sub> Ga <sub>x</sub> ) <sub>2-d</sub> Ti <sub>2</sub> O <sub>7-3d/2</sub> , Bi <sub>2</sub> Ti <sub>4</sub> O <sub>11</sub>                                                                                  |                          |
| 24     | 37.0               | 8.0                | 55.0             | 12 + 12          | TiO <sub>2</sub> , (Bi <sub>1-x</sub> Ga <sub>x</sub> ) <sub>2-d</sub> Ti <sub>2</sub> O <sub>7-3d/2</sub> , BiGaTi <sub>4</sub> O <sub>11</sub>                                                                           |                          |
| 25     | 43.5               | 4.0                | 52.5             | 12 + 12          | (Bi <sub>1-x</sub> Ga <sub>x</sub> ) <sub>2-d</sub> Ti <sub>2</sub> O <sub>7-3d/2</sub> , Bi <sub>2</sub> Ti <sub>4</sub> O <sub>11</sub>                                                                                  |                          |
| 26     | 40.0               | 8.7                | 51.3             | 12 + 12          | (Bi <sub>1-x</sub> Ga <sub>x</sub> ) <sub>2-d</sub> Ti <sub>2</sub> O <sub>7-3d/2</sub> , TiO <sub>2</sub>                                                                                                                 |                          |
| 27     | 39.5               | 10.5               | 50.0             | 12 + 12          | (Bi <sub>1-x</sub> Ga <sub>x</sub> ) <sub>2-d</sub> Ti <sub>2</sub> O <sub>7-3d/2</sub> , Ga <sub>2</sub> O <sub>3</sub> , BiGaTi <sub>4</sub> O <sub>11</sub>                                                             |                          |
| 28     | 45.5               | 2.0                | 52.5             | 12 + 12          | (Bi <sub>1-x</sub> Ga <sub>x</sub> ) <sub>2-d</sub> Ti <sub>2</sub> O <sub>7-3d/2</sub> ( $x = 0.04$ , $d = 0.19$ )<br>>>Bi <sub>2</sub> Ti <sub>4</sub> O <sub>11</sub> , Bi <sub>4</sub> Ti <sub>3</sub> O <sub>12</sub> | 10.3522(2)               |
| 29     | 45.0               | 3.0                | 52.0             | 12 + 12          | (Bi <sub>1-x</sub> Ga <sub>x</sub> ) <sub>2-d</sub> Ti <sub>2</sub> O <sub>7-3d/2</sub> ( $x = 0.06$ , $d = 0.15$ )                                                                                                        | 10.3508(3)               |
| 30     | 44.0               | 4.5                | 51.5             | 12 + 12          | (Bi <sub>1-x</sub> Ga <sub>x</sub> ) <sub>2-d</sub> Ti <sub>2</sub> O <sub>7-3d/2</sub> ( $x = 0.09$ , $d = 0.12$ )                                                                                                        | 10.3471(2)               |
| 31     | 43.0               | 6.0                | 51.0             | 12 + 12          | (Bi <sub>1-x</sub> Ga <sub>x</sub> ) <sub>2-d</sub> Ti <sub>2</sub> O <sub>7-3d/2</sub> ( $x = 0.12$ , $d = 0.08$ )                                                                                                        | 10.3444(2)               |
| 32     | 42.5               | 7.5                | 50.0             | 12 + 12          | (Bi <sub>1-x</sub> Ga <sub>x</sub> ) <sub>2-d</sub> Ti <sub>2</sub> O <sub>7-3d/2</sub> ( $x = 0.15$ , $d = 0.00$ )                                                                                                        | 10.3451(2)               |
| 33     | 41.3               | 8.8                | 50.0             | 12 + 12          | (Bi <sub>1-x</sub> Ga <sub>x</sub> ) <sub>2-d</sub> Ti <sub>2</sub> O <sub>7-3d/2</sub> ( $x \sim 0.18$ , $d \sim 0.00$ )<br>>>BiGaTi <sub>4</sub> O <sub>11</sub> , TiO <sub>2</sub>                                      | 10.3416(2)               |
| 34     | 46.0               | 2.5                | 51.5             | 12 + 12          | (Bi <sub>1-x</sub> Ga <sub>x</sub> ) <sub>2-d</sub> Ti <sub>2</sub> O <sub>7-3d/2</sub> ( $x \sim 0.05$ , $d \sim 0.12$ )<br>>>Bi <sub>4</sub> Ti <sub>3</sub> O <sub>12</sub>                                             | 10.3550(2)               |
| 35     | 44.5               | 4.5                | 51.0             | 12 + 12          | (Bi <sub>1-x</sub> Ga <sub>x</sub> ) <sub>2-d</sub> Ti <sub>2</sub> O <sub>7-3d/2</sub> ( $x = 0.09$ , $d = 0.08$ )                                                                                                        | 10.3541(6)               |
| 36     | 44.5               | 5.0                | 50.5             | 12 + 12          | (Bi <sub>1-x</sub> Ga <sub>x</sub> ) <sub>2-d</sub> Ti <sub>2</sub> O <sub>7-3d/2</sub> ( $x = 0.10$ , $d = 0.04$ )                                                                                                        | 10.3508(2)               |
| 37     | 43.0               | 8.0                | 49.0             | 12 + 12          | (Bi <sub>1-x</sub> Ga <sub>x</sub> ) <sub>2-d</sub> Ti <sub>1.96</sub> Ga <sub>0.04</sub> O <sub>7-3d/2</sub><br>( $x = 0.16$ , $d = 0.01$ )                                                                               | 10.3459(2)               |

|    |      |     |      |         |                                                                                                       |
|----|------|-----|------|---------|-------------------------------------------------------------------------------------------------------|
| 38 | 45.0 | 5.0 | 50.0 | 12 + 12 | $(\text{Bi}_{1-x}\text{Ga}_x)_{2-d}\text{Ti}_2\text{O}_{7-3d/2}, \text{Bi}_4\text{Ti}_3\text{O}_{12}$ |
| 39 | 43.5 | 8.5 | 48.0 | 12 + 12 | $(\text{Bi}_{1-x}\text{Ga}_x)_{2-d}\text{Ti}_2\text{O}_{7-3d/2}, \text{Bi}_4\text{Ti}_3\text{O}_{12}$ |
| 40 | 47.5 | 2.5 | 50.0 | 12 + 12 | $(\text{Bi}_{1-x}\text{Ga}_x)_{2-d}\text{Ti}_2\text{O}_{7-3d/2}, \text{Bi}_4\text{Ti}_3\text{O}_{12}$ |
| 41 | 50.0 | 2.5 | 47.5 | 12 + 12 | $(\text{Bi}_{1-x}\text{Ga}_x)_{2-d}\text{Ti}_2\text{O}_{7-3d/2}, \text{Bi}_4\text{Ti}_3\text{O}_{12}$ |
| 42 | 50.0 | 5.0 | 45.0 | 12 + 12 | $(\text{Bi}_{1-x}\text{Ga}_x)_{2-d}\text{Ti}_2\text{O}_{7-3d/2}, \text{Bi}_4\text{Ti}_3\text{O}_{12}$ |
| 43 | 48.8 | 2.5 | 48.8 | 12 + 12 | $(\text{Bi}_{1-x}\text{Ga}_x)_{2-d}\text{Ti}_2\text{O}_{7-3d/2}, \text{Bi}_4\text{Ti}_3\text{O}_{12}$ |
| 44 | 47.5 | 5.0 | 47.5 | 12 + 12 | $(\text{Bi}_{1-x}\text{Ga}_x)_{2-d}\text{Ti}_2\text{O}_{7-3d/2}, \text{Bi}_4\text{Ti}_3\text{O}_{12}$ |

**Table S2** The results of EPMA for the single crystal  $(\text{Bi}_{1.62}\text{Ga}_{0.14}\text{Ti}_2\text{O}_{6.64})$  prepared by slow cooling from 1250 °C

| Point      | $\text{Bi}_2\text{O}_3$<br>(mass%) | $\text{Ga}_2\text{O}_3$<br>(mass%) | $\text{TiO}_2$<br>(mass%) | Total<br>(mass%) |
|------------|------------------------------------|------------------------------------|---------------------------|------------------|
| 1          | 69.2                               | 2.2                                | 29.2                      | 100.5            |
| 2          | 69.3                               | 2.6                                | 29.7                      | 101.5            |
| 3          | 68.6                               | 2.6                                | 29.2                      | 100.4            |
| 4          | 69.4                               | 2.6                                | 28.6                      | 100.6            |
| 5          | 68.9                               | 2.8                                | 28.6                      | 100.3            |
| 6          | 67.0                               | 2.0                                | 28.9                      | 98.0             |
| 7          | 68.0                               | 2.4                                | 28.3                      | 98.7             |
| 8          | 68.0                               | 2.3                                | 29.5                      | 99.7             |
| 9          | 68.7                               | 1.9                                | 28.9                      | 99.6             |
| 10         | 69.6                               | 2.0                                | 29.0                      | 100.6            |
| avg.(dev.) | 68.7(8)                            | 2.3(3)                             | 29.0(4)                   | 100(1)           |

**Table S3** Anisotropic displacement parameters ( $\text{\AA}^2$ ) for  $\text{Bi}_{1.62}\text{Ga}_{0.14}\text{Ti}_2\text{O}_{6.64}$ .

| Atom | $U_{11}$   | $U_{22}$  | $U_{33}$  | $U_{23}$   | $U_{13}$   | $U_{12}$   |
|------|------------|-----------|-----------|------------|------------|------------|
| Bi1  | 0.0096(13) | 0.0103(9) | 0.040(3)  | -0.0023(9) | -0.0032(8) | -0.0013(8) |
| Ti1a | 0.0039(4)  | 0.0039(4) | 0.0039(4) | -0.0008(4) | -0.0008(4) | -0.0008(4) |
| O1a  | 0.015(2)   | 0.008(2)  | 0.022(3)  | 0.0076(15) | 0          | 0          |

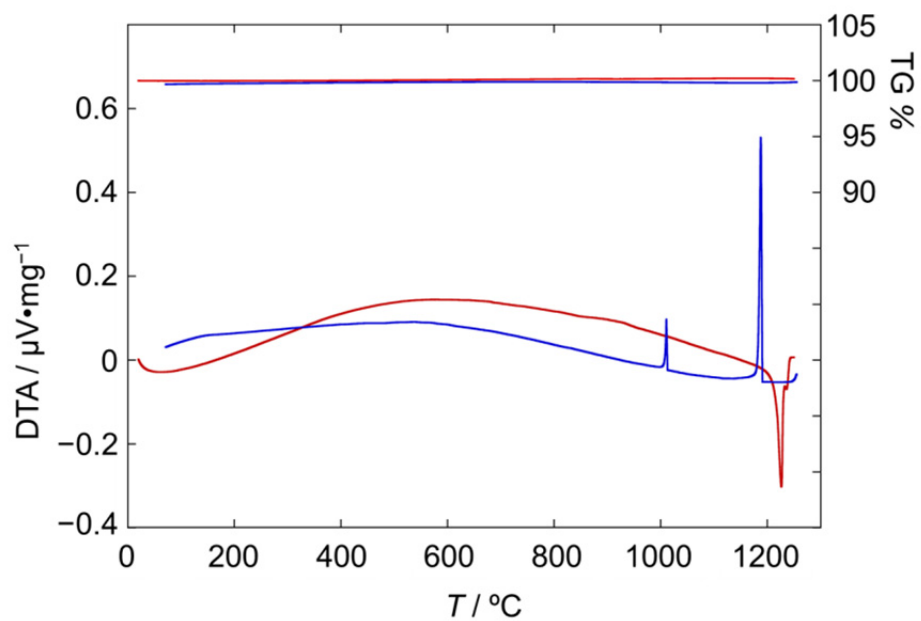

**Fig. S1** TG-DTA curves generated by  $(\text{Bi}_{1-x}\text{Ga}_x)_2-d\text{Ti}_2\text{O}_{7-3d/2}$  ( $x = 0.09$ ,  $d = 0.08$ , sample 35) on heating (red) and on cooling (blue).

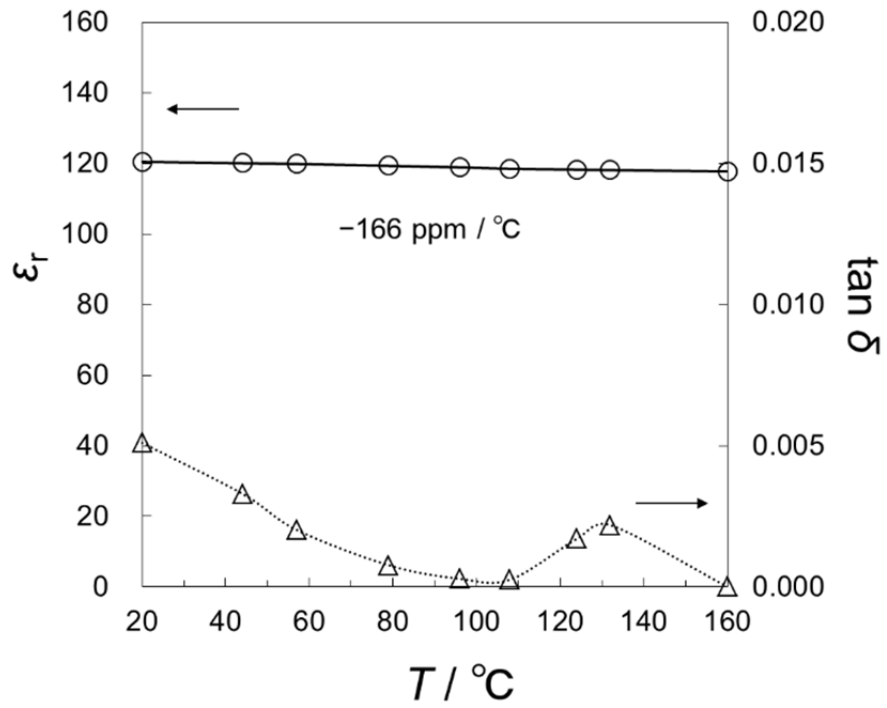

**Fig. S2** Temperature dependence of the dielectric constant  $\epsilon_r$ , and loss  $\tan \delta$  values determined for  $(\text{Bi}_{1-x}\text{Ga}_x)_2\text{-dTi}_2\text{O}_{7-3d/2}$  (sample 29 ( $x = 0.06$ ,  $d = 0.15$ )) at 1 MHz.
